# Supplementary material for: Costs of hospital trauma team simulation training: a prospective cohort study
Source: HighWire-hosted journal article supplement (doi:10.1136/bmjopen-2020-046845), 2021-06-01
Supplement: bmjopen-2020-046845supp001_data_supplement.pdf [file bmjopen-2020-046845supp001_data_supplement.pdf]

**APPENDIX**

Supplement 1. Non-technical skills of trauma teams (N= 22 teams) after first and second Thorax injury patient simulations in autumn 2017 according to T-NOTECHS (5 = flawless teamwork and 1 = the team failed to demonstrate teamwork).

| Domain variable                         | After 1 <sup>st</sup> Thorax injury simulation  |                         | After 2nd Thorax injury simulation |                         | Change (points) |         | P -value* |         |
|-----------------------------------------|-------------------------------------------------|-------------------------|------------------------------------|-------------------------|-----------------|---------|-----------|---------|
|                                         | Mean, ± SD <sup>^</sup> , (95%CI <sup>°</sup> ) |                         | Mean, ± SD, (95%CI)                |                         | Rater 1         | Rater 2 | Rater 1   | Rater 2 |
|                                         | Rater 1                                         | Rater 2                 | Rater 1                            | Rater 2                 |                 |         |           |         |
| Leadership                              | 3.74 ± 0.81 (3.35-4.13)                         | 4.11 ± 0.68 (3.77-4.45) | 4.28 ± 0.58 (3.99-4.56)            | 4.47 ± 0.51 (4.21-4.74) | 0.56            | 0.35    | <.001     | .009    |
| Cooperation and resource management     | 3.58 ± 0.61 (3.29–3.87)                         | 3.94 ± 0.55 (3.68–4.21) | 4.17 ± 0.38 (3.98-4.36)            | 4.47 ± 0.51 (4.21-4.74) | 0.61            | 0.47    | <.001     | .002    |
| Communication and interaction           | 3.37 ± 0.60 (3.08-3.66)                         | 3.50 ± 0.51 (3.24-3.76) | 4.00 ± 0.59 (3.70-4.30)            | 4.24 ± 0.56 (3.95-4.52) | 0.67            | 0.71    | <.001     | <.001   |
| Assessment and decision making          | 3.58 ± 0.51 (3.33-3.82)                         | 3.83 ± 0.62 (3.53-4.14) | 3.94 ± 0.54 (3.68-4.21)            | 4.47 ± 0.51 (4.21-4.74) | 0.38            | 0.65    | .015      | <.001   |
| Situation awareness /coping with stress | 3.68 ± 0.58 (3.40-3.96)                         | 4.22 ± 0.55 (3.95-4.49) | 4.28 ± 0.67 (3.95-4.61)            | 4.71 ± 0.47 (4.46-4.95) | 0.61            | 0.47    | .001      | .002    |

<sup>^</sup>Standard deviation

<sup>°</sup>95% Confidence Interval

\*p values <.05 are deemed statistically significant (paired-samples t-test).

Supplement 2. Non-technical skills of trauma teams (N= 22 teams) after first and second Car accident patient simulations in autumn 2018 according to T-NOTECHS (5 = flawless teamwork and 1 = the team failed to demonstrate teamwork).

| Domain variable                        | After 1st Car accident simulation                    |                             | After 2nd Car accident simulation |                             | Change (points) |         | P -value* |         |
|----------------------------------------|------------------------------------------------------|-----------------------------|-----------------------------------|-----------------------------|-----------------|---------|-----------|---------|
|                                        | Mean, $\pm$ SD <sup>^</sup> , (95% CI <sup>°</sup> ) |                             | Mean, $\pm$ SD, (95% CI)          |                             | Rater 1         | Rater 2 | Rater 1   | Rater 2 |
|                                        | Rater 1                                              | Rater 2                     | Rater 1                           | Rater 2                     |                 |         |           |         |
| Leadership                             | 4.05 $\pm$ 0.72 (3.73-4.37)                          | 3.82 $\pm$ 0.59 (3.56-4.08) | 4.64 $\pm$ 0.49 (4.42-4.85)       | 4.73 $\pm$ 0.55 (4.48-4.97) | 0.59            | 0.91    | <.001     | <.001   |
| Cooperation and resource management    | 3.91 $\pm$ 0.53 (3.68-4.14)                          | 3.91 $\pm$ 0.53 (3.68-4.14) | 4.45 $\pm$ 0.60 (4.19-4.72)       | 4.68 $\pm$ 0.48 (4.47-4.89) | 0.54            | 0.77    | .002      | <.001   |
| Communication and interaction          | 3.91 $\pm$ 0.53 (3.68-4.14)                          | 3.82 $\pm$ 0.50 (3.60-4.04) | 4.50 $\pm$ 0.51 (4.27-4.73)       | 4.50 $\pm$ 0.51 (4.27-4.73) | 0.59            | 0.68    | <.001     | <.001   |
| Assessment and decision making         | 4.14 $\pm$ 0.47 (3.93-4.34)                          | 4.05 $\pm$ 0.49 (3.83-4.26) | 4.36 $\pm$ 0.49 (4.15-4.58)       | 4.64 $\pm$ 0.58 (4.38-4.89) | 0.22            | 0.59    | .135      | <.001   |
| Situation awareness/coping with stress | 4.41 $\pm$ 0.50 (4.19-4.63)                          | 4.18 $\pm$ 0.50 (3.96-4.40) | 4.77 $\pm$ 0.43 (4.58-4.96)       | 4.73 $\pm$ 0.46 (4.53-4.93) | 0.36            | 0.45    | .008      | <.001   |

<sup>^</sup>Standard deviation

<sup>°</sup>95% Confidence Interval

\*p values <.05 are deemed statistically significant (paired-samples t-test).
